# Supplementary material
Source: Springer Nature journal article supplement (https://www.springermedizin.de/resource/supplementary/13012_2013_791_MOESM2_ESM.pdf/9630698)
Supplement: MOESM2 [file 9630698]

|                                | Inputs                                | Activity                                                                                                                                                                                                                   | Process outputs                                                                                                                                                                                                                     |                                                                                                                                       | Outcomes                                                         | Impact                                                               |
|--------------------------------|---------------------------------------|----------------------------------------------------------------------------------------------------------------------------------------------------------------------------------------------------------------------------|-------------------------------------------------------------------------------------------------------------------------------------------------------------------------------------------------------------------------------------|---------------------------------------------------------------------------------------------------------------------------------------|------------------------------------------------------------------|----------------------------------------------------------------------|
| All arms                       | Ministry of Health 2-day RDT training | Training on RDT utility, malaria case management, performing RDTs, recording results, quality control, compliance to results                                                                                               | HWs know why they are using RDTs, when and how to use and interpret results correctly and safely, how to record, report and monitor RDT use, how RDTs are quality controlled and to comply with results                             | HWs have capacity and rationale for doing RDTs, keeping records, trust in test quality and know that RDTs are the 'right' thing to do |                                                                  |                                                                      |
|                                | Resources                             | ACTs , RDTs and supplies for RDTs delivered 6-weekly                                                                                                                                                                       | ACTs and RDTs in supply                                                                                                                                                                                                             | HWs do not feel the need to stock pile                                                                                                | HWs use RDTs for all non-severe febrile patients                 | Reduced morbidity from misdiagnosed and mistreated febrile illnesses |
| Health Worker and patient arms | TACT 3 follow-up workshops            | Interactive small group workshops plus reflective homework on importance of RDT use, confidence in following RDT results, communication with patients, managing alternative causes of fever, sustaining change in practice | HWs know the rationale supporting RDT use and how to manage alternative causes of fever.<br>HWs have practiced following RDT results, communicating with patients.<br>HWs have solved local logistical issues to facilitate RDT use | HWs have confidence to apply the RDT strategy in their own practice and to solve issues arising that affect RDT use                   | HWs do not give antimalarials without testing first              | Reduced cost of fever episodes for patients                          |
|                                | Feedback SMS                          | HWs sent summary of their performance with RDTs and adherence to results                                                                                                                                                   | HWs know how well they have performed                                                                                                                                                                                               | HWs motivated to perform well in relation to RDTs                                                                                     | HWs prescribe appropriate antimalarials to RDT positive patients | Reduced cost of antimalarial subsidies                               |
|                                | Motivational SMS                      | HWs sent message about malaria case management plus a proverb                                                                                                                                                              | HWs reminded of good case management and motivated by proverb                                                                                                                                                                       | HWs motivated to perform well generally                                                                                               | HWs do not prescribe antimalarials to RDT negative patients      | Reduced likelihood of artemisinin resistance                         |
|                                | Patient arm                           | HWs provided with leaflets and posters for explaining RDTs to patients                                                                                                                                                     | HWs reminded to perform RDTs and follow results and able to communicate this need to patients                                                                                                                                       | HWs confident to challenge patient expectations for antimalarials                                                                     |                                                                  |                                                                      |
|                                | Patient arm                           | Patient leaflet/poster                                                                                                                                                                                                     |                                                                                                                                                                                                                                     |                                                                                                                                       |                                                                  |                                                                      |
